# Supplementary material for: A highly conductive, robust, self-healable, and thermally responsive liquid metal-based hydrogel for reversible electrical switches
Source: Royal Society of Chemistry journal article supplement (doi:10.1039/d4tb00209a), 2024-01-01
Supplement: d4tb00209a1.pdf [file d4tb00209a1.pdf]

## Supporting Information

# Highly conductive, robust, self-healable, and thermally responsive liquid metal-based hydrogel for reversible electrical switch

Joo Hyung Lee<sup>1</sup>, Ji Eun Hyun<sup>2</sup>, Jongbeom Kim<sup>3</sup>, Jungin Yang<sup>4</sup>, Huanan Zhang<sup>5</sup>, Hyunchul Ahn<sup>6\*</sup>, Sohee Lee<sup>7,8\*</sup>, Jung Han Kim<sup>9\*</sup>, Taehwan Lim<sup>4\*</sup>

<sup>1</sup>The Research Institute of Industrial Science, Hanyang University, Seoul 04763, South Korea

<sup>2</sup>Department of Organic and Nano Engineering, Hanyang University, Seoul 04763, South Korea

<sup>3</sup>Department of Materials Science and Engineering, Seoul National University, Seoul 08826, South Korea

<sup>4</sup>Division of Chemical Engineering and Bioengineering, Kangwon National University, Chuncheon, Gangwon-do 24341, South Korea

<sup>5</sup>Department of Chemical Engineering, University of Utah, Salt Lake City, Utah 84112, United States

<sup>6</sup>Department of Fiber System Engineering, Yeungnam University, Gyeongsan, Gyeongsangbuk-do 38541, South Korea

<sup>7</sup>Department of Clothing and Textiles, Gyeongsang National University, Jinju, Gyeongsangnam-do 52828, South Korea

<sup>8</sup>Research Institute of Natural Science, Gyeongsang National University, Jinju, Gyeongsangnam-do 52828, South Korea

<sup>9</sup>Department of Materials Science and Engineering, Dong-A University, Busan 49315, South Korea

\*Authors to whom correspondence should be addressed: [hyunchul.ahn@yu.ac.kr](mailto:hyunchul.ahn@yu.ac.kr), [sohee.lee@gnu.ac.kr](mailto:sohee.lee@gnu.ac.kr), [junghankim@dau.ac.kr](mailto:junghankim@dau.ac.kr), [taehwan.lim@kangwon.ac.kr](mailto:taehwan.lim@kangwon.ac.kr)

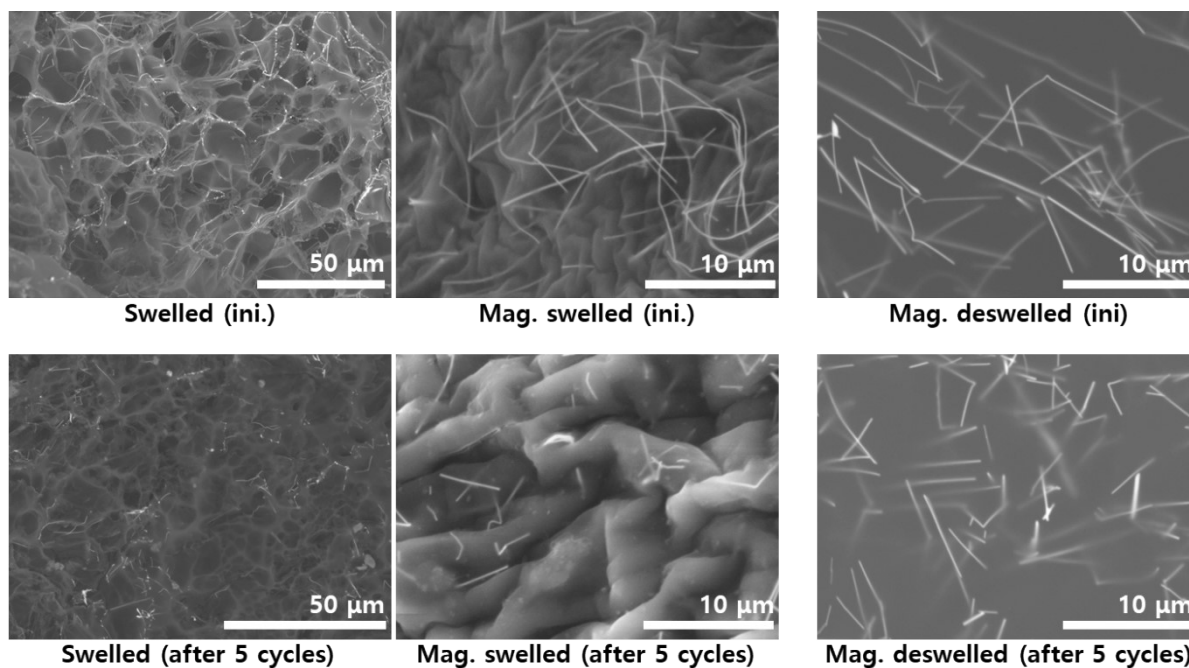

**Figure S1.** Morphologies of the silver ultralong nanowire (AgULNWs) after 5-time swelling/deswelling cycles. Pristine AgULNWs were prepared by the traditional method stated in ref (Curry et al. 2022).

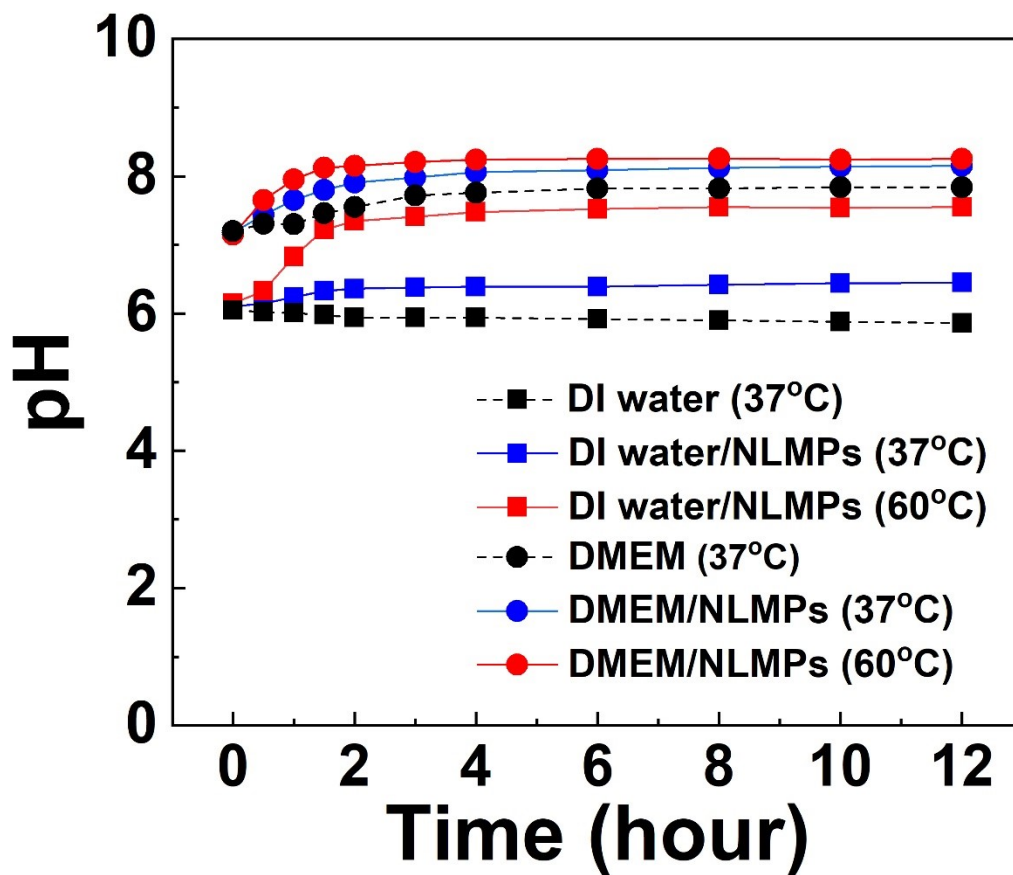

**Figure S2.** pH variation of DI water and DMEM with nanoscale liquid metal particles (NLMPs) at 37°C (blue) and 60°C (red), respectively. The pH of DI water and DMEM without NLMPs were also displayed with dash lines.

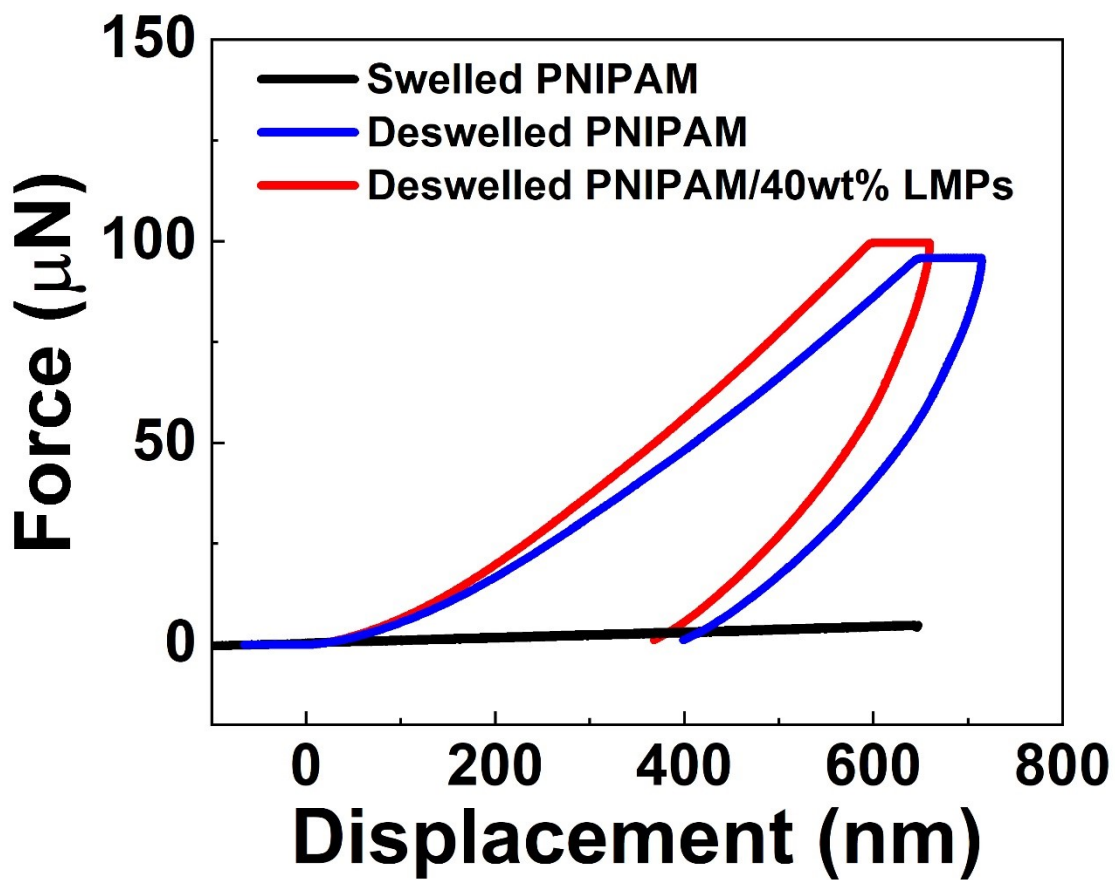

**Figure S3.** Mechanical properties of the swelled (black) and deswelled (blue) PNIPAM hydrogels. 40wt% LMPs integrated deswelled PNIPAM hydrogel was also attached in the graph (red). All the mechanical properties were obtained by nanoindentation.

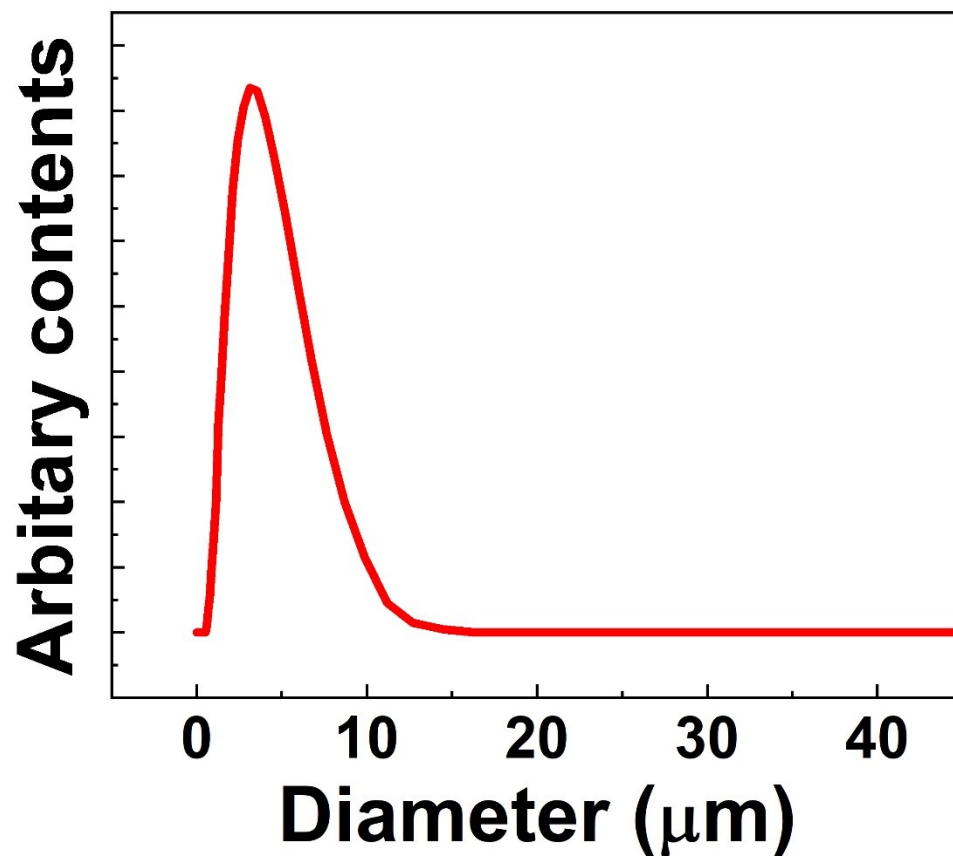

**Figure S4.** Particle size distribution confirmation of LMPs fabricated by sonication method and filtered by a micron-scale mesh. Averaged particle size of the LMPs is  $0.72 \pm 0.13 \mu\text{m}$ .

**Table S1.** Determination of the nanoscale liquid metal particles concentration in PNIPAM/LMPs hydrogels

| Introduced LMPs (wt%) | Ave. residue (wt%)<br>from 5-time measurement | Modified LMPs concentration (wt%) | STD  | Definition        |
|-----------------------|-----------------------------------------------|-----------------------------------|------|-------------------|
| 0                     | 0.84                                          | <b>0</b>                          | 0.06 |                   |
| 10                    | 3.51                                          | <b>2.67</b>                       | 1.14 |                   |
| 20                    | 9.55                                          | <b>8.71</b>                       | 1.95 | <b>10wt% LMPs</b> |
| 30                    | 22.59                                         | <b>21.75</b>                      | 2.11 | <b>20wt% LMPs</b> |
| 45                    | 32.54                                         | <b>31.70</b>                      | 2.59 | <b>30wt% LMPs</b> |
| 60                    | 40.61                                         | <b>39.77</b>                      | 1.42 | <b>40wt% LMPs</b> |
| 65                    | 49.62                                         | <b>48.78</b>                      | 1.96 | <b>50wt% LMPs</b> |
| 80                    | 61.29                                         | <b>60.45</b>                      | 1.37 | <b>60wt% LMPs</b> |
